# Supplementary material
Source: HighWire-hosted journal article supplement (doi:10.1101/rna.049551.115)
Supplement: SuppFigLegends.docx [file SuppFigLegends.docx]

**Supplemental Information**

**Figure 1. RNAi-resistant (RNAi-R) CCC deletion mutants are expressed during simultaneous knockdown of corresponding endogenous proteins.** RNAi-R CCC deletion mutants were constructed as described in Figure 4 or were RNAi-R because the dsRNA targeted region was not contained in the deletion (Figure 2). HA-tagged, N- and C-terminal RNAi-R deletion mutants of (A) Symplekin (B*)* CPSF100 and (C)CPSF73 were expressed in Dmel-2 cells simultaneously RNAi-depleted of the corresponding endogenous protein. Depletion of endogenous protein in each mutant cell line was compared to no dsRNA and non-specific (LacZ) dsRNA controls.

**Figure 2. Symplekin and CPSF73 deletion mutants do not act dominantly in the presence of wild type, full length endogenous CCC components.** HA-tagged CPSF73 and Symplekin deletion mutants were expressed in Dmel-2 cells in the absence of RNAi-depletion of endogenous CCC components. H2A 3’ ends were assessed by S1 assay as in Figure 5. Gels are labeled as in Figures 5B-5D. Samples having CPSF73 (A) and Symplekin (B) and mutants showed only properly processed H2A mRNA.
